# Supplementary material for: A MOF-derived hierarchical CoP@ZnIn2S4 photocatalyst for visible light-driven hydrogen evolution
Source: Royal Society of Chemistry journal article supplement (doi:10.1039/d2cc01946a), 2022-01-01
Supplement: d2cc01946a1.pdf [file d2cc01946a1.pdf]

## Electronic Supplementary Information

### **A MOF-derived hierarchical CoP@ZnIn<sub>2</sub>S<sub>4</sub> photocatalyst for visible light-driven hydrogen evolution**

**Boyuan Wu<sup>a</sup>, Ning Liu<sup>a</sup>, Lele Lu<sup>a</sup>, Ruizhe Zhang<sup>a</sup>, Runhao Zhang<sup>a</sup>, Wei Shi<sup>\*ab</sup> and Peng Cheng<sup>ab</sup>**

<sup>a</sup> Department of Chemistry, Key Laboratory of Advanced Energy Materials Chemistry (MOE) and Renewable Energy Conversion and Storage Centre (RECAST), College of Chemistry, Nankai University, Tianjin 300071, China.

<sup>b</sup> Haihe Laboratory of Sustainable Chemical Transformations, Tianjin 300192, China

\* Corresponding author. E-mail address: shiwei@nankai.edu.cn (W. Shi)

## 1 Experimental section

### 2 Materials

3 All chemicals were purchased from commercial sources and used without any further purification:  
4  $\text{Co}(\text{NO}_3)_2 \cdot 6\text{H}_2\text{O}$  (99%, Aladdin), 2-methylimidazole (>98%, TCI),  $\text{NaH}_2\text{PO}_2$  (99%, Macklin),  $\text{ZnCl}_2$  (98%,  
5 TCI),  $\text{InCl}_3 \cdot 4\text{H}_2\text{O}$  (99.99% metal basis, Adamas-beta), thioacetamide (ACS, >99%, Aladdin), glycerol (99%,  
6 Aladdin), methanol and absolute ethanol (AR, Concord Technology).

### 7 Synthesis

8 **Synthesis of ZIF-67:** 0.582 g of  $\text{Co}(\text{NO}_3)_2 \cdot 6\text{H}_2\text{O}$  (2.0 mmol) and 0.656 g of 2-methylimidazole (8.0 mmol)  
9 were dissolved in 50 mL of methanol respectively to form two transparent solution, then the two  
10 solutions were quickly mixed under magnetic stirring. After stirring for 5 minutes, they were left to  
11 stand at room temperature for 24 hours. The purple solid was collected by centrifugation, washed with  
12 methanol for 3 times and dried at 60 °C overnight to obtain ZIF-67. The yield was 13.2 %.

13 **Synthesis of MOF-derived CoP:** 500 mg as-prepared ZIF-67 were placed in a covered crucible and  
14 calcined in a muffle furnace at 350 °C for 2 hours to experience a gentle oxidization process. Then 100  
15 mg products and 2.0 g  $\text{NaH}_2\text{PO}_2$  were put into two separated boats within a tube furnace, with  $\text{NaH}_2\text{PO}_2$   
16 placing at the upstream. The tube furnace was then heated at 300 °C for 2 hours with the ramping rate  
17 of 2 °C  $\text{min}^{-1}$  in Ar atmosphere. After cooling down to room temperature naturally, the black products  
18 were collected as CoP.

19 **Synthesis of CoP@ZnIn<sub>2</sub>S<sub>4</sub>:**  $\text{ZnIn}_2\text{S}_4$  nanosheets were grown on the surface of CoP by hydrothermal  
20 method: 5 mg CoP were fully dispersed in the mixed solvent composed of 40 mL deionized water and  
21 10 mL glycerol by magnetic stirring for 30 minutes after 5 minutes of ultrasonic treatment. Then, 132.6  
22 mg  $\text{ZnCl}_2$  (1.0 mmol), 586.5 mg  $\text{InCl}_3 \cdot 4\text{H}_2\text{O}$  (2.0 mmol) and 450.8 mg (6.0 mmol) thioacetamide (TAA)  
23 were added to the above dispersion. The mixture was reacted at 80 °C under magnetic stirring for 3  
24 hours. The products were centrifuged to obtain the solids, which were washed three times with water  
25 and ethanol followed by drying at 60 °C for 12 hours, the products were labeled as CoP@ZnIn<sub>2</sub>S<sub>4</sub>-5. To  
26 prepare the CoP@ZnIn<sub>2</sub>S<sub>4</sub>-10 and CoP@ZnIn<sub>2</sub>S<sub>4</sub>-15, the addition amounts of CoP were changed to 10  
27 mg and 15 mg with no change in other steps. In addition, pure  $\text{ZnIn}_2\text{S}_4$  was synthesized without adding  
28 any CoP.

### 29 Characterizations

30 Powder X-ray diffraction (PXRD) patterns were obtained by a Rigaku Smartlab SE diffractometer using  
31  $\text{Cu-K}\alpha$  radiation ( $\lambda = 1.54046 \text{ \AA}$ ) with scan rate of 2°  $\text{min}^{-1}$ . The nitrogen adsorption-desorption isotherms  
32 were measured on a Micromeritics ASAP 2020 Plus HD88 surface area and porosity analyzer. ZEISS  
33 MERLIN COMPACT field-emission scanning electron microscope (SEM) and FEI Talos F200X G2  
34 transmission electron microscope (TEM) were used to investigate the size and morphology of the  
35 materials. X-ray photoelectron spectroscopy (XPS) measurements were performed on Kratos Analytical  
36 Axis Ultra DLD detector using monochromated  $\text{Al-K}\alpha$  radiation as the excitation source. UV-vis diffuse  
37 reflectance spectra were recorded on a Shimadzu UV-2600 spectrophotometer.

### 38 Photocatalytic hydrogen evolution test

1 The photocatalytic hydrogen evolution experiments were conducted using Labsolar 6A system (Beijing  
2 PerfectLight Technology Co., Ltd.). A 300W Xe lamp (Microsolar300, Beijing PerfectLight Technology  
3 Co., Ltd.) with a UV-cutoff filter ( $\lambda \geq 420$  nm) is used as light source. 10 mg photocatalyst, 100 mL 10  
4 vol% triethanolamine (TEOA) aqueous solution were added into a reaction vessel equipped with a top  
5 quartz window. Then the reactor was sealed and degassed 30 min to remove air before photocatalytic  
6 reaction. The initial pressure before starting photocatalytic reaction is  $\sim 1.0$  kPa. During the reaction,  
7 the solution was continuously magnetically stirred and kept at 5 °C by a flow of cooling water. The  
8 evolved gas was analyzed by gas chromatography with a thermal conductive detector (TCD) and a 5 Å  
9 molecular sieve column using argon as the carrier gas.

## 10 **Photoelectrochemical measurement**

11 A CHI760E electrochemical workstation (Shanghai Chenhua Instrument Co., Ltd) was used to carry out  
12 photoelectrochemical measurements. Ag/AgCl served as the reference electrode and Pt plate served  
13 as the counter electrode, respectively. The electrolyte was 0.2 M Na<sub>2</sub>SO<sub>4</sub> aqueous solution. The working  
14 electrodes were prepared according to the following procedure: at first, the FTO substrate was  
15 sonicated in acetone, absolute ethanol and distilled water for 30 min continuously. Then, 5 mg sample  
16 powder was dispersed in 500  $\mu$ L ethanol and 50  $\mu$ L Nafion solution under ultrasonication for 1 h. Finally,  
17 the as-prepared slurry was uniformly dropped onto a 1 cm $\times$ 1 cm FTO and dried in air. Photocurrents of  
18 the samples were measured by using 300 W Xe lamp (Microsolar300, Beijing PerfectLight Technology  
19 Co., Ltd.) as light source with 0.5 V (versus Ag/AgCl) potential applied.<sup>1</sup> The electrochemical impedance  
20 spectroscopy (EIS) was performed in the frequency range from 10<sup>5</sup> to 10<sup>-1</sup> Hz at the open-circuit voltage.  
21 Mott–Schottky plots were measured under a frequency of 1000, 2000 and 3000 Hz.

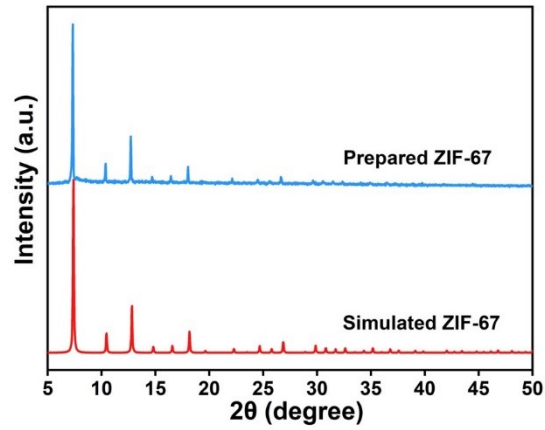

Fig. S1 PXRD patterns of prepared ZIF-67 and simulated ZIF-67.

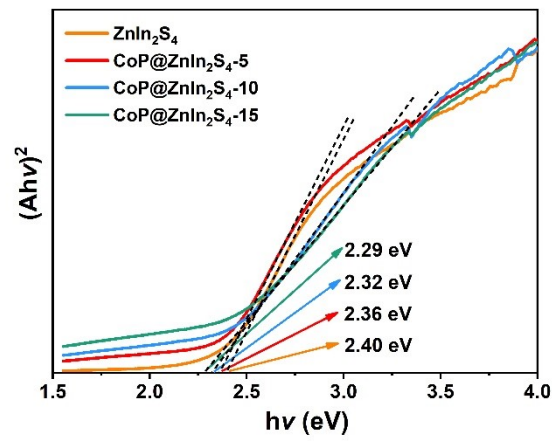

Fig. S2 Bandgap values of  $\text{ZnIn}_2\text{S}_4$  and  $\text{CoP@ZnIn}_2\text{S}_4$ .

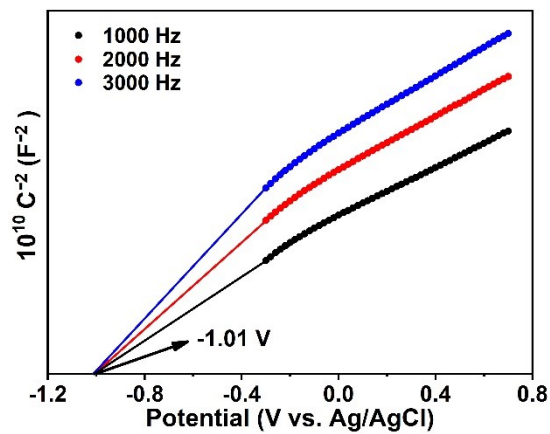

Fig. S3 Mott-Schottky plot of  $\text{ZnIn}_2\text{S}_4$ .

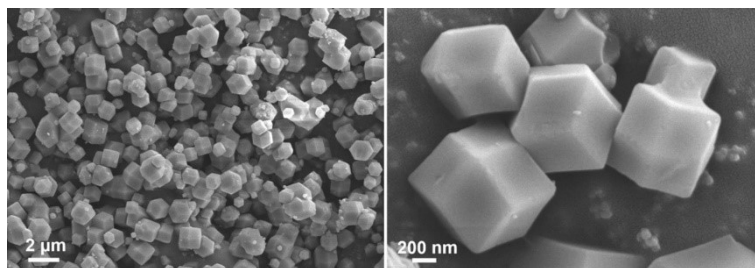

**Fig. S4** SEM images of ZIF-67.

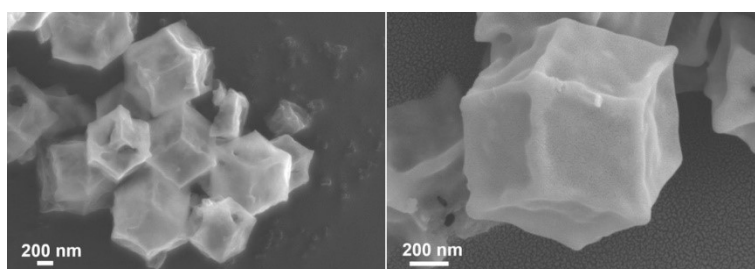

**Fig. S5** SEM images of ZIF-67-derived CoP.

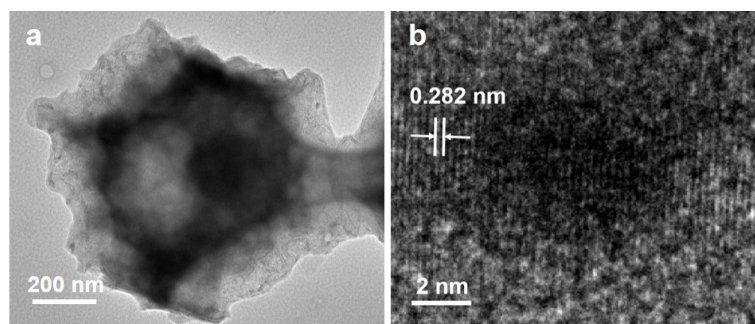

**Fig. S6** (a) TEM image and (b) HRTEM image of ZIF-67-derived CoP.

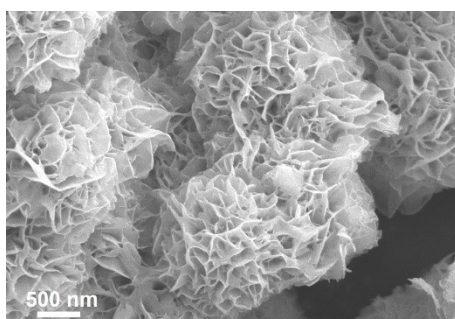

**Fig. S7** SEM image of ZnIn<sub>2</sub>S<sub>4</sub>.

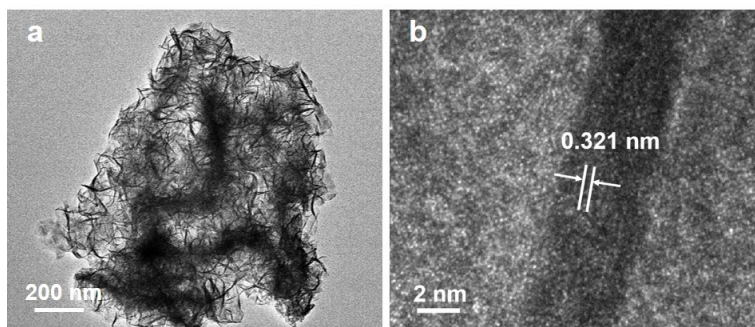

**Fig. S8** (a) TEM image and (b) HRTEM image of  $\text{ZnIn}_2\text{S}_4$ .

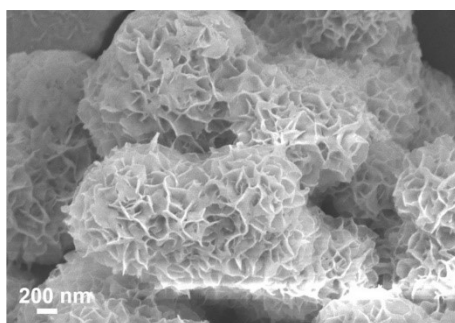

**Fig. S9** SEM image of  $\text{CoP@ZnIn}_2\text{S}_4\text{-5}$

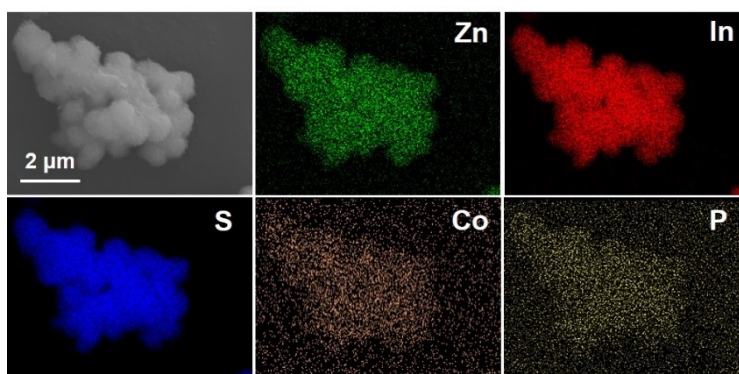

**Fig. S10** SEM elemental mapping images of  $\text{CoP@ZnIn}_2\text{S}_4\text{-5}$

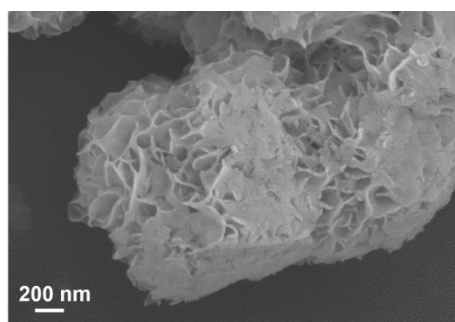

**Fig. S11** SEM image of  $\text{CoP@ZnIn}_2\text{S}_4\text{-10}$

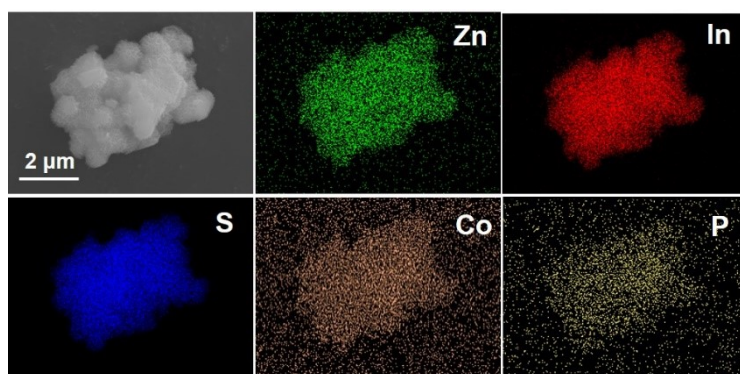

**Fig. S12** SEM elemental mapping images of CoP@ZnIn<sub>2</sub>S<sub>4</sub>-10

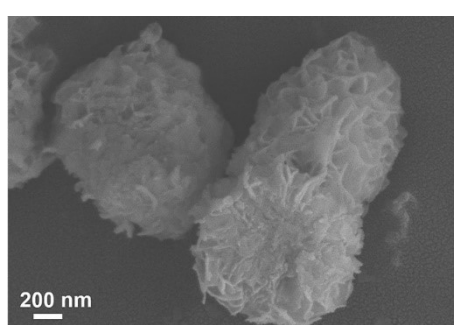

**Fig. S13** SEM image of CoP@ZnIn<sub>2</sub>S<sub>4</sub>-15

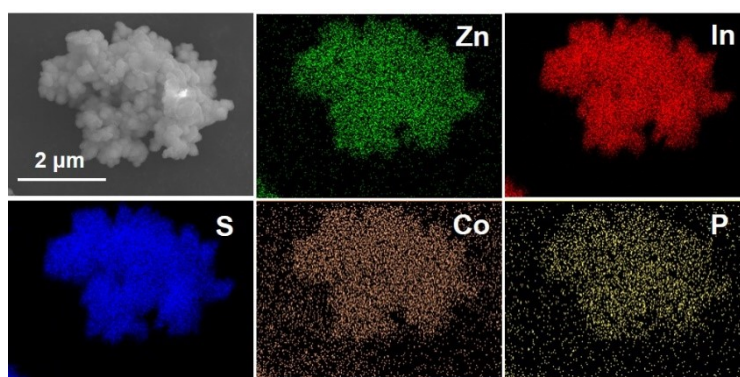

**Fig. S14** SEM elemental mapping images of CoP@ZnIn<sub>2</sub>S<sub>4</sub>-15



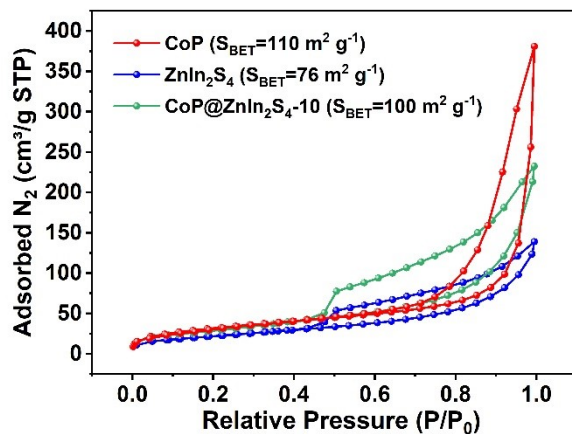

Fig. S15 N<sub>2</sub> adsorption-desorption isotherms of CoP, ZnIn<sub>2</sub>S<sub>4</sub> and CoP@ZnIn<sub>2</sub>S<sub>4</sub>-10 (at 77 K).

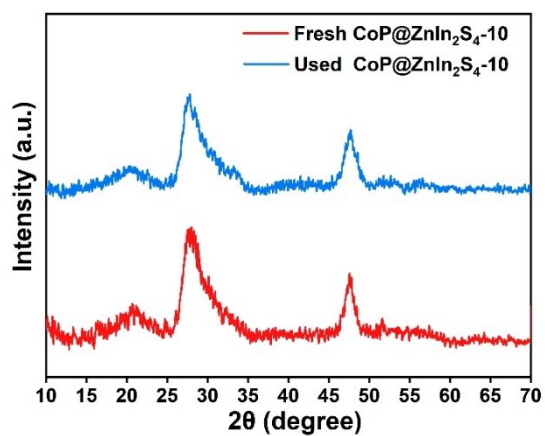

Fig. S16 PXRD patterns of fresh CoP@ZnIn<sub>2</sub>S<sub>4</sub>-10 and used CoP@ZnIn<sub>2</sub>S<sub>4</sub>-10.

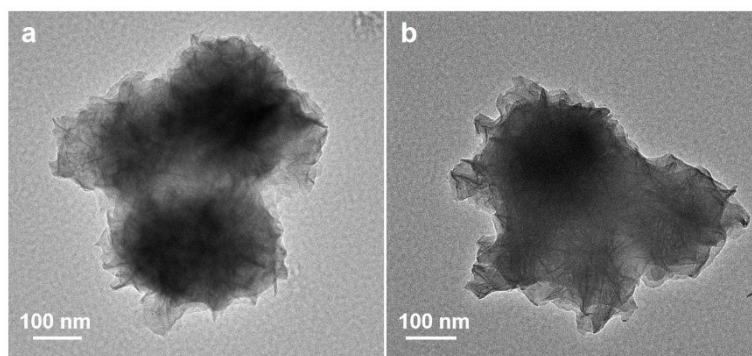

Fig. S17 TEM images of (a) fresh CoP@ZnIn<sub>2</sub>S<sub>4</sub>-10 and (b) used CoP@ZnIn<sub>2</sub>S<sub>4</sub>-10.



**Table S1.** Summary of some ZnIn<sub>2</sub>S<sub>4</sub>-based photocatalysts for hydrogen evolution reaction.

| Photocatalyst                                                                      | Sacrificial agent                                     | Light source                  | Activity<br>( $\mu\text{mol h}^{-1}\text{g}^{-1}$ ) | AQE              | Ref.             |
|------------------------------------------------------------------------------------|-------------------------------------------------------|-------------------------------|-----------------------------------------------------|------------------|------------------|
| Au/MoS <sub>2</sub> /ZnIn <sub>2</sub> S <sub>4</sub>                              | Na <sub>2</sub> SO <sub>3</sub> and Na <sub>2</sub> S | 150 W Xe lamp<br>(>400 nm)    | 18955                                               | —                | 2                |
| CdIn <sub>2</sub> S <sub>4</sub> /ZnIn <sub>2</sub> S <sub>4</sub>                 | Na <sub>2</sub> SO <sub>3</sub> and Na <sub>2</sub> S | 300 W Xe lamp<br>(>420 nm)    | 12670                                               | 18.73% at 420 nm | 3                |
| CoP@ZnIn <sub>2</sub> S <sub>4</sub>                                               | TEOA                                                  | 300 W Xe lamp<br>(>420 nm)    | 10310                                               | 16.3% at 420 nm  | <b>This work</b> |
| Co <sub>3</sub> S <sub>8</sub> /ZnIn <sub>2</sub> S <sub>4</sub>                   | TEOA                                                  | 300 W Xe lamp                 | 9039                                                | —                | 4                |
| Ultrathin MoS <sub>2</sub> /ZnIn <sub>2</sub> S <sub>4</sub>                       | TEOA                                                  | 300 W Xe lamp<br>(>400 nm)    | 8898                                                | —                | 5                |
| Protonated g-C <sub>3</sub> N <sub>4</sub> /ZnIn <sub>2</sub> S <sub>4</sub>       | TEOA                                                  | 300 W Xe lamp<br>(>400 nm)    | 8601.16                                             | 0.92% at 400 nm  | 6                |
| Ni(OH) <sub>2</sub> /ZnIn <sub>2</sub> S <sub>4</sub>                              | TEOA                                                  | 300 W Xe lamp<br>(>400 nm)    | 8350                                                | —                | 7                |
| NH <sub>2</sub> -UiO-66/ZnIn <sub>2</sub> S <sub>4</sub>                           | Na <sub>2</sub> SO <sub>3</sub> and Na <sub>2</sub> S | 300 W Xe lamp<br>(>420 nm)    | 7300                                                | —                | 8                |
| ZnIn <sub>2</sub> S <sub>4</sub> /In(OH) <sub>3</sub> -NiS                         | lactic acid                                           | 300 W Xe lamp<br>(>420 nm)    | 7010                                                | 14.3% at 420 nm  | 9                |
| MIL-101/ZnIn <sub>2</sub> S <sub>4</sub>                                           | lactic acid                                           | 300 W Xe lamp<br>(>420 nm)    | 5800                                                | 10.93% at 420 nm | 10               |
| Ag <sub>x</sub> Au <sub>1-x</sub> alloy-ZnIn <sub>2</sub> S <sub>4</sub>           | Na <sub>2</sub> S and Na <sub>2</sub> SO <sub>3</sub> | 300 W Xe lamp<br>(>420 nm)    | 5400.7                                              | 8.06%            | 11               |
| SnSe/ZnIn <sub>2</sub> S <sub>4</sub>                                              | TEOA                                                  | 300 W Xe lamp<br>(400–800 nm) | 5058                                                | 9% at 420 nm     | 12               |
| ZnIn <sub>2</sub> S <sub>4</sub> /CDs                                              | Na <sub>2</sub> S and Na <sub>2</sub> SO <sub>3</sub> | 300 W Xe lamp<br>(>420 nm)    | 4150                                                | —                | 13               |
| WO <sub>3</sub> /ZnIn <sub>2</sub> S <sub>4</sub>                                  | TEOA                                                  | 300 W Xe lamp<br>(>420 nm)    | 3900                                                | —                | 14               |
| CoNi bimetal-ZnIn <sub>2</sub> S <sub>4</sub>                                      | ascorbic acid                                         | 300 W Xe lamp<br>(>420 nm)    | 3336                                                | —                | 15               |
| CdS/ZnIn <sub>2</sub> S <sub>4</sub>                                               | Na <sub>2</sub> S and Na <sub>2</sub> SO <sub>3</sub> | 300 W Xe lamp<br>(320–780 nm) | 3072                                                | 15.9% at 420 nm  | 16               |
| WS <sub>2</sub> /ZnIn <sub>2</sub> S <sub>4</sub> (3%)                             | lactic acid                                           | 300 W Xe lamp<br>(>420 nm)    | 2550                                                | 3.2% at 420 nm   | 17               |
| ZnIn <sub>2</sub> S <sub>4</sub> @NH <sub>2</sub> -MIL-125(Ti)                     | Na <sub>2</sub> S and Na <sub>2</sub> SO <sub>3</sub> | 300 W Xe lamp<br>(>420 nm)    | 2204.2                                              | 4.3% at 420 nm   | 18               |
| Ni <sub>2</sub> P/ZnIn <sub>2</sub> S <sub>4</sub>                                 | lactic acid                                           | 300 W Xe lamp<br>(>400 nm)    | 2066                                                | —                | 19               |
| Black phosphorus/ZnIn <sub>2</sub> S <sub>4</sub>                                  | Na <sub>2</sub> S and Na <sub>2</sub> SO <sub>3</sub> | 300 W Xe lamp<br>(>420 nm)    | 1278                                                | 0.25% at 450 nm  | 20               |
| Ti <sub>3</sub> C <sub>2</sub> @TiO <sub>2</sub> /ZnIn <sub>2</sub> S <sub>4</sub> | Na <sub>2</sub> S and Na <sub>2</sub> SO <sub>3</sub> | 300 W Xe lamp                 | 1185.8                                              | —                | 21               |

**Table S2.** Bi-exponential curve fitted parameters of TRPL spectra for as-prepared samples.

|                                             | <b>A<sub>1</sub> (%)</b> | <b>τ<sub>1</sub> (ns)</b> | <b>A<sub>2</sub> (%)</b> | <b>τ<sub>2</sub> (ns)</b> | <b>τ<sub>ave</sub> (ns)</b> |
|---------------------------------------------|--------------------------|---------------------------|--------------------------|---------------------------|-----------------------------|
| <b>ZnIn<sub>2</sub>S<sub>4</sub></b>        | 90.1                     | 1.26                      | 9.9                      | 1.33                      | 1.27                        |
| <b>CoP@ZnIn<sub>2</sub>S<sub>4</sub>-5</b>  | 87.3                     | 1.25                      | 12.7                     | 5.79                      | 3.08                        |
| <b>CoP@ZnIn<sub>2</sub>S<sub>4</sub>-10</b> | 80.9                     | 1.31                      | 19.1                     | 7.55                      | 4.90                        |
| <b>CoP@ZnIn<sub>2</sub>S<sub>4</sub>-15</b> | 84.2                     | 1.27                      | 15.8                     | 6.24                      | 3.65                        |

The TRPL decay curves are fitted by bi-exponential fitting according to the following function:

$$I(t) = A_1 \cdot \exp(-t/\tau_1) + A_2 \cdot \exp(-t/\tau_2)$$

where,  $I$  is the normalized emission intensity,  $\tau_1$  and  $\tau_2$  are the lifetime values;  $A_1$  and  $A_2$  are corresponding constants indicating the amplitudes. Then, on the basis of the above fitting data, the average lifetime ( $\tau_{ave}$ ) is calculated by following:<sup>22</sup>

$$\tau_{ave} = \frac{A_1 \tau_1^2 + A_2 \tau_2^2}{A_1 \tau_1 + A_2 \tau_2}$$

## References

1. D. Gao, J. Xu, L. Wang, B. Zhu, H. Yu, J. Yu, *Adv. Mater.*, 2022, **34**, 2108475.
2. G. Swain, S. Sultana and K. Parida, *Inorg. Chem.*, 2019, **58**, 9941-9955.
3. X. Dang, M. Xie, F. Dai, J. Guo, J. Liu and X. Lu, *J. Mater. Chem. A*, 2021, **9**, 14888-14896.
4. G. Zhang, D. Chen, N. Li, Q. Xu, H. Li, J. He and J. Lu, *Angew. Chem. Int. Ed.*, 2020, **59**, 8255-8261.
5. W. Li, Z. Lin and G. Yang, *Nanoscale*, 2017, **9**, 18290-18298.
6. H. Yang, R. Cao, P. Sun, J. Yin, S. Zhang and X. Xu, *Appl. Catal. B*, 2019, **256**, 117862.
7. S. Li, D. Dai, L. Ge, Y. Gao, C. Han and N. Xiao, *Dalton Trans.*, 2017, **46**, 10620-10629.
8. C. Zhao, H. Jiang, Q. Liang, M. Zhou, Y. Zhang, Z. Li and S. Xu, *Solar Energy*, 2020, **207**, 599-608.
9. L. Ye, Z. Wen, Z. Li and H. Huang, *Solar RRL*, 2020, **4**, 2000027.
10. H. Chang, H. Wu, Y. Yang, L. Xie, W. Fan, M. Zou, G. Ma, Z. Jiang and Y. Zhang, *Int. J. Hydrogen Energy*, 2020, **45**, 30571-30582.
11. H. An, M. Li, R. Liu, Z. Gao and Z. Yin, *Chem. Eng. J.*, 2020, **382**, 122953.
12. C. Du, B. Yan and G. Yang, *Chem. Eng. J.*, 2021, **404**, 126477.
13. K. Lei, M. Kou, Z. Ma, Y. Deng, L. Ye and Y. Kong, *Colloids Surf. A*, 2019, **574**, 105-114.
14. L. Ye and Z. Wen, *Inter. J. Hydrogen Energy*, 2019, **44**, 3751-3759.
15. Z. Li, X. Wang, W. Tian, A. Meng and L. Yang, *ACS Sustainable Chem. Eng.*, 2019, **7**, 20190-20201.
16. Y. Zhu, J. Chen, L. Shao, X. Xia, Y. Liu and L. Wang, *Appl. Catal. B*, 2020, **268**, 118744.
17. M. Xiong, B. Chai, J. Yan, G. Fan and G. Song, *Appl. Surf. Sci.*, 2020, **514**, 145965.
18. H. Liu, J. Zhang and D. Ao, *Appl. Catal. B*, 2018, **221**, 433-442.
19. X.-l. Li, X.-j. Wang, J.-y. Zhu, Y.-p. Li, J. Zhao and F.-t. Li, *Chem. Eng. J.*, 2018, **353**, 15-24.
20. Q. Zhang, J. Zhang, L. Zhang, M. Cao, F. Yang and W.-L. Dai, *Appl. Surf. Sci.*, 2020, **504**, 144366.
21. K. Huang, C. Li and X. Meng, *J. Colloid Interface Sci.*, 2020, **580**, 669-680.
22. Z. Zhao, J. Wu, Y-Z. Zheng, N. Li, X. Li, X. Tao, *ACS Catal.*, 2019, **9**, 8144-8152.
